# Supplementary material
Source: publisher figshare collection journal article supplement (https://future-science-group.figshare.com/ndownloader/files/34796833)
Supplement: Supplementary file 1 [file 34796833]

>pCJR01_+flaA_comp_map
ctaaattgtaagcgttaatattttgttaaaattcgcgttaaatttttgttaaatcagctcattttttaaccaataggcc
gaaatcggcaaaatcccttataaatcaaaagaatagaccgagatagggttgagtgttgttccagtttggaacaagagtc
cactattaaagaacgtggactccaacgtcaaagggcgaaaaaccgtctatcagggcgatggcccactacgtgaaccatc
accctaatcaagttttttggggtcgaggtgccgtaaagcactaaatcggaaccctaaagggagcccccgatttagagct
tgacggggaaagccggcgaacgtggcgagaaaggaagggaagaaagcgaaaggagcgggcgctagggcgctggcaagtg
tagcggtcacgctgcgcgtaaccaccacacccgccgcgcttaatgcgccgctacagggcgcgtcccattcgccattcag
gctgcgcaactgttgggaagggcgatcggtgcgggcctcttcgctattacgccagctggcgaaagggggatgtgctgca
aggcgattaagttgggtaacgccagggttttcccagtcacgacgttgtaaaacgacggccagtgagcgcgcgtaatacg
actcactatagggcgaattgggtaccgggccccccctcgacgcgtaggcggattatcaagtctcttgtgaaatctaatg
gcttaaccattaaactgcttgggaaactgatagtctagagtgagggagaggcagatggaattggtggtgtaggggtaaa
atccgtagatatcaccaagaatacccattgcgaaggcgatctgctggaactcaactgacgctaaggcgcgaaagcgtgg
ggagcaaacaggattagataccctggtagtccacgccctaaacgatgtacactagttgttggggtgctagtcatctcag
taatgcagctaacgcattaagtgtaccgcctggggagtacggtcgcaagattaaaactcaaaggaatagacggggaccc
gcacaagcggtggagcatgtggtttaattcgaagatacgcgaagaaccttacctgggcttgatatcctaagaaccttat
agagatatgagggtgctagcttgctagaacttagagacaggtgctgcacggctgtcgtcagctcgtgtcgtgagatgtt
gggttaagtcccgcaacgagcgcaacccacgtatttagttgctaacggttcggccgagcactctaaatagactgccttc
gtaaggaggaggaaggtgtggacgacgtcaagtcatcatggcccttatgcccagggcgacacacgtgctacaatggcat
atacaatgagacgcaataccgcgaggtggagcaaatctataaaatatgtcccagttcggattgttctctgcaactcgag
agcatgaagccggaatcgctagtaatcgtagatcagccatgctacggtgaatacgttcccgggtcttgtactcaccgcc
cgtcacaccatgggagttgatttcactcgaagccggaatactaaactagttaccgtccacagtggaatcagcgactggg
gtgaagtcgtaacaaggtaaccgtaggagaacctgcggttggatcacctcctttcgcggccgcgtttgtagatatttgt
atctatttataggattttataggtttgtaggaacggtatctttaaatactgtagaaaagaggaaggaaataataaATGg
ctaaaatgagaatatcaccggaattgaaaaaactgatcgaaaaataccgctgcgtaaaagatacggaaggaatgtctcc
tgctaaggtatataagctggtgggagaaaatgaaaacctatatttaaaaatgacggacagccggtataaagggaccacc
tatgatgtggaacgggaaaaggacatgatgctatggctggaaggaaagctgcctgttccaaaggtcctgcactttgaac
ggcatgatggctggagcaatctgctcatgagtgaggccgatggcgtcctttgctcggaagagtatgaagatgaacaaag
ccctgaaaagattatcgagctgtatgcggagtgcatcaggctctttcactccatcgacatatcggattgtccctatacg
aatagcttagacagccgcttagccgaattggattacttactgaataacgatctggccgatgtggattgcgaaaactggg
aagaagacactccatttaaagatccgcgcgagctgtatgattttttaaagacggaaaagcccgaagaggaacttgtctt
ttcccacggcgacctgggagacagcaacatctttgtgaaagatggcaaagtaagtggctttattgatcttgggagaagc
ggcagggcggacaagtggtatgacattgccttctgcgtccggtcgatcagggaggatatcggggaagaacagtatgtcg
agctattttttgacttactggggatcaagcctgattgggagaaaataaaatattatattttactggatgaattgtttTA
Gtaccccatcagttttattggttttggtactttttcaactcaagaaagagctgctagagaagctagagtaccaagcaca
ggaaaaacaatcaaagttcctgctacaagagttgcaaaatttaaggtaggtaaaaaccttaaagaagctgttgcaaaag
caagcggcaaaaagaaaaaataaaacttcggctagataaattctagccttctttcttaattaattcagatattttgtat
cttttatttactttatttttttaaacttttataaaactatcattattaaacaaaaaaggatattaaaattATGGGATTT
CGTATTAACACCAATGTTGCAGCTTTAAATGCTAAAGCAAACGCTGATTTAAATAGTAAAAGTTTAGATGCTTCTTTAA
GCAGACTTAGTTCAGGTCTTAGAATCAACTCCGCAGCAGATGATGCTTCAGGGATGGCGATAGCAGATAGTTTAAGATC
TCAAGCTAATACTTTAGGTCAAGCTATATCTAATGGTAATGATGCTTTAGGTATCTTACAAACTGCTGATAAGGCTATG
GATGAGCAACTTAAAATCTTAGATACAATCAAAACTAAGGCAACTCAAGCAGCTCAAGATGGACAAAGTTTAAAAACAA
GAACTATGCTTCAAGCAGATATCAACCGTTTAATGGAAGAACTTGACAATATCGCAAATACTACTTCATTTAACGGTAA
ACAACTTTTAAGTGGAAATTTTATCAATCAAGAATTTCAAATCGGTGCGAGTTCAAATCAAACTATAAAAGCTACTATA
GGAGCAACTCAGTCTTCTAAAATCGGTTTAACACGCTTTGAAACAGGAGGAAGAATTTCATCTAGTGGCGAAGTGCAAT
TTACTCTTAAAAACTACAACGGTATAGATGATTTTAAGTTTCAAAAAGTTGTGATTTCAACTTCAGTTGGAACAGGACT
TGGAGCCTTGGCAGATGAGATCAATAAAAATGCTGATAAAACCGGTGTTAGAGCTACTTTTACAGTAGAAACTAGAGGT
ATGGCTGCAGTTAGAGCCGGAACTACTTCAAATGACTTTGCTATCAATGGGGTAACTATAGGTAAAGTAGATTATAAGG
ATGGTGATGCCAATGGATCTTTGGTTTCTGCAATCAATTCAGTTAAAGATACTACCGGAGTTGAAGCTTCAATCGATGC
TAATGGACAACTTTTGCTTACTTCAAGAGAAGGTAGAGGGATTAAAATTGATGGTGATATAGGCGGGGGTGCTTTTATC
AATGCCAATATGAAAGAAAATTATGGCCGCTTGTCTTTAGTTAAAAACGATGGTAAGGATATTTTAGTAAGTGGTACAG
GATTAACTGCTGCAGGATTTGGTGCAAATAGTTTTATTTCTCAAGCTTCTGTTTCTTTAAGAGAATCAAAAGGACAAAT
TGATGCTAATATCGCTGATGCTATGGGATTTGGTTCTGTAAATAAAGGTGTTGTGATAGGTGGTTTTTCTTCTGTTTCT
GCTTATATGAGTAGTGCAGGAAGTGGATTTTCAGCAGGTTCAGGTTATTCTATAGGTAGTAGTAAGGGTTATTCTGCTA
TACTTACTGCTAATGCAACAGTTATATCAACTGCATCTGCAGCTTCTAGGGTATATAATGTTTCTTCTGGTTCTGGTTT
TTCAGTTGGGTCAAATTTATCACAATTTGCAACCATGAAAACTTCAGTTCTTGGAGTAAAAGATGAAACCGCAGGTGTT
ACCACACTTAAGGGTGCTATGGCAGTGATGGACATAGCTGAAACGGCTATAACAAATCTTGATCAAATCAGAGCTGACA
TTGGTTCAGTGCAAAATCAAGTTACATCAACTATAAACAACATTACCGTTACTCAGGTAAACGTTAAAGCAGCTGAGTC
ACAAATCCGTGATGTAGACTTTGCAGCCGAGAGTGCAAACTACTCTAAAGCAAATATCTTAGCTCAAAGTGGCTCTTAT
GCCATGGCACAGGCTAATTCTGTTCAACAAAATGTTTTAAGATTGCTACAGTAGTTTACAAAAGCTGCcccgggctcga
ggcggccgctagagtacaaagtaataagtctcacaactattacttcaatatataaactcaattgattcttgtttagatt
tcaaagattgatgataaagctaattgtttatggggaattagctcagctgggagagcgcctgctttgcacgcaggaggtc
agcggttcgatcccgctattctccaccatttattaagggcctatagctcagctggttagagtgcacccctgataagggt
gaggtcacaagttcaagtcttgttaggcccaccataaaaaagatttgaataaagaagctttaaaatctaaagcaagtat
ataaagtagattaaatataaaatataaactctatacttagatttattttttatctttaactataaaagaatatacttta
atagatataagtagcatatacattatgcatttatatttataatgattatgttaatatatatacttcctttaggttttaa
acctaaatgttctttttaattatcattgttaagagtcacaagcaagttttaataaaaacaattttacaggacttgttaa
aggataaaacctatttatcttttctttagtttaacttaacttttagctgtctttatttctatgaataaagagaatattg
gatttaaggattataaattaaagacaagtttcaaactcacagcttagttgagactaaatcatttagttttatattaagt
gtttgaatgctttccgtcttaagataaagaagtcttatcataaaaactttaacaaggaagtgatgcgttttagaatcaa
taataaaaggtaaaaaaaggtaagctactaagagcgaatggtggatgccttgactggtaaaggcgatgaaggacgtact
agactgcgataagctacggggagctgtcaagaagctttgatccgtagatttccgaatggggcaacccaatgtatagaga
tatacattacctatataggagcgaacgaggggaattgaaacatcttagtaccctcaggaaaagaaatcaatagagattg
cgtcagtagcggcgaggccgccaccgcggtggagctccagcttttgttccctttagtgagggttaattgcgcgcttggc
gtaatcatggtcatagctgtttcctgtgtgaaattgttatccgctcacaattccacacaacatacgagccggaagcata
aagtgtaaagcctggggtgcctaatgagtgagctaactcacattaattgcgttgcgctcactgcccgctttccagtcgg
gaaacctgtcgtgccagctgcattaatgaatcggccaacgcgcggggagaggcggtttgcgtattgggcgctcttccgc
ttcctcgctcactgactcgctgcgctcggtcgttcggctgcggcgagcggtatcagctcactcaaaggcggtaatacgg
ttatccacagaatcaggggataacgcaggaaagaacatgtgagcaaaaggccagcaaaaggccaggaaccgtaaaaagg
ccgcgttgctggcgtttttccataggctccgcccccctgacgagcatcacaaaaatcgacgctcaagtcagaggtggcg
aaacccgacaggactataaagataccaggcgtttccccctggaagctccctcgtgcgctctcctgttccgaccctgccg
cttaccggatacctgtccgcctttctcccttcgggaagcgtggcgctttctcatagctcacgctgtaggtatctcagtt
cggtgtaggtcgttcgctccaagctgggctgtgtgcacgaaccccccgttcagcccgaccgctgcgccttatccggtaa
ctatcgtcttgagtccaacccggtaagacacgacttatcgccactggcagcagccactggtaacaggattagcagagcg
aggtatgtaggcggtgctacagagttcttgaagtggtggcctaactacggctacactagaaggacagtatttggtatct
gcgctctgctgaagccagttaccttcggaaaaagagttggtagctcttgatccggcaaacaaaccaccgctggtagcgg
tggtttttttgtttgcaagcagcagattacgcgcagaaaaaaaggatctcaagaagatcctttgatcttttctacgggg
tctgacgctcagtggaacgaaaactcacgttaagggattttggtcatgagattatcaaaaaggatcttcacctagatcc
ttttcgaccgaataaatacctgtgacggaagatcacttcgcagaataaataaatcctggtgtccctgttgataccggga
agccctgggccaacttttggcgaaaatgagacgttgatcggcacgtaagaggttccaactttcaccataatgaaataag
atcactaccgggcgtattttttgagttgtcgagattttcaggagctaaggaagctaaaatggagaaaaaaatcactgga
tataccaccgttgatatatcccaatggcatcgtaaagaacattttgaggcatttcagtcagttgctcaatgtacctata
accagaccgttcagctggatattacggcctttttaaagaccgtaaagaaaaataagcacaagttttatccggcctttat
tcacattcttgcccgcctgatgaatgctcatccggaattacgtatggcaatgaaagacggtgagctggtgatatgggat
agtgttcacccttgttacaccgttttccatgagcaaactgaaacgttttcatcgctctggagtgaataccacgacgatt
tccggcagtttctacacatatattcgcaagatgtggcgtgttacggtgaaaacctggcctatttccctaaagggtttat
tgagaatatgtttttcgtctcagccaatccctgggtgagtttcaccagttttgatttaaacgtggccaatatggacaac
ttcttcgcccccgttttcaccatgggcaaatattatacgcaaggcgacaaggtgctgatgccgctggcgattcaggttc
atcatgccgtttgtgatggcttccatgtcggcagaatgcttaatgaattacaacagtactgcgatgagtggcagggcgg
ggcgtaatttttttaaggcagttattggtgcccttaaacgcctggttgctacgcctgaataagtgataataagcggatg
aatggcagaaattcgaaagcaaattcgacccggtcgtcggttcagggcagggtcgttaaatagccgcttatgtctattg
ctggtttaccggtttattgactaccggaagcagtgtgaccgtgtgcttctcaaatgcctgaggccagtttgctcaggct
ctccccgtggaggtaataattgacgatatgatcctttttttctgatcaaaagtgctcatcattggaaaacgttcttcgg
ggcgaaaactctcaaggatcttaccgctgttgagatccagttcgatgtaacccactcgtgcacccaactgatcttcagc
atcttttactttcaccagcgtttctgggtgagcaaaaacaggaaggcaaaatgccgcaaaaaagggaataagggcgaca
cggaaatgttgaatactcatactcttcctttttcaatattattgaagcatttatcaagggttattgtctcatgagcgga
tacatatttgaatgtatttagaaaaataaacaaataggggttccgcgcacatttccccgaaaagtgccac
